# Supplementary material for: Construction of a Multifunctional Nano-Scale Metal-Organic Framework-Based Drug Delivery System for Targeted Cancer Therapy
Source: MDPI journal article supplement (doi:10.3390/pharmaceutics13111945), 2021-11-17
Supplement: s1 [file s1]

# Supplementary Materials: Construction of a Multifunctional Nano-Scale Metal-Organic Framework-Based Drug Delivery System for Targeted Cancer Therapy

Mengru Cai, Yawen Zeng, Manting Liu, Longtai You, Huating Huang, Yang Hao, Xingbin Yin, Changhai Qu, Jian Ni and Xiaoxv Dong

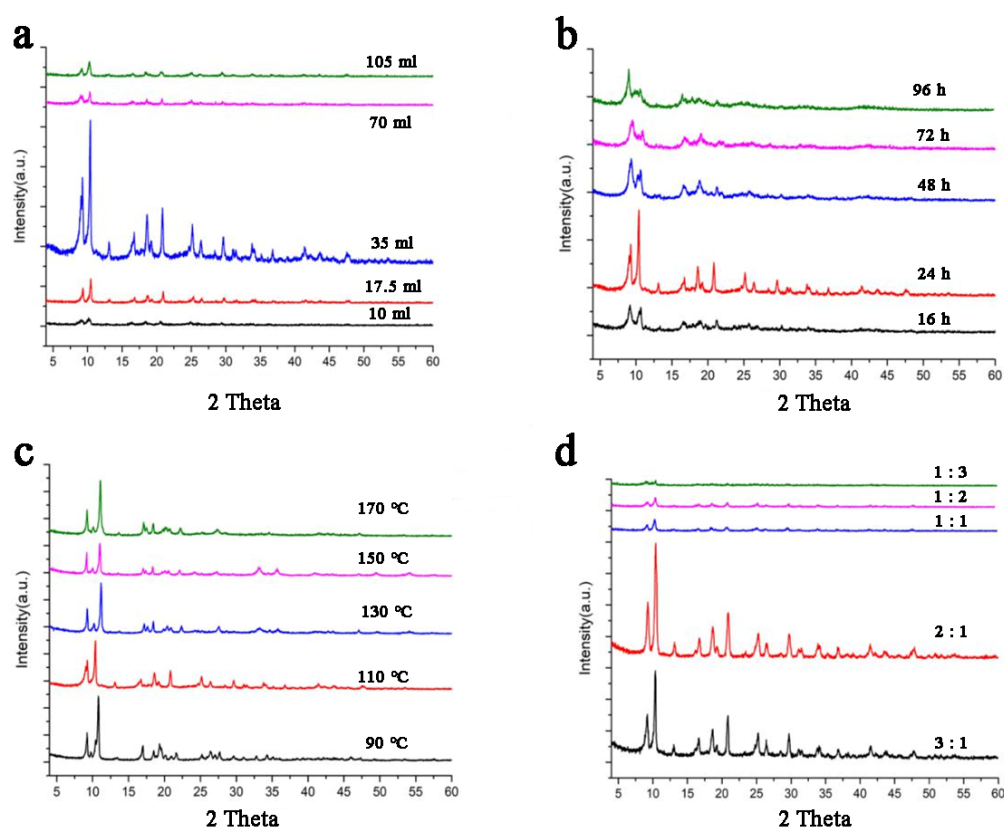

**Figure S1.** XRD pattern of Fe-MIL-101 (a: different solvent amount, b: different reaction time, c: different reaction temperature, d: different ratio).

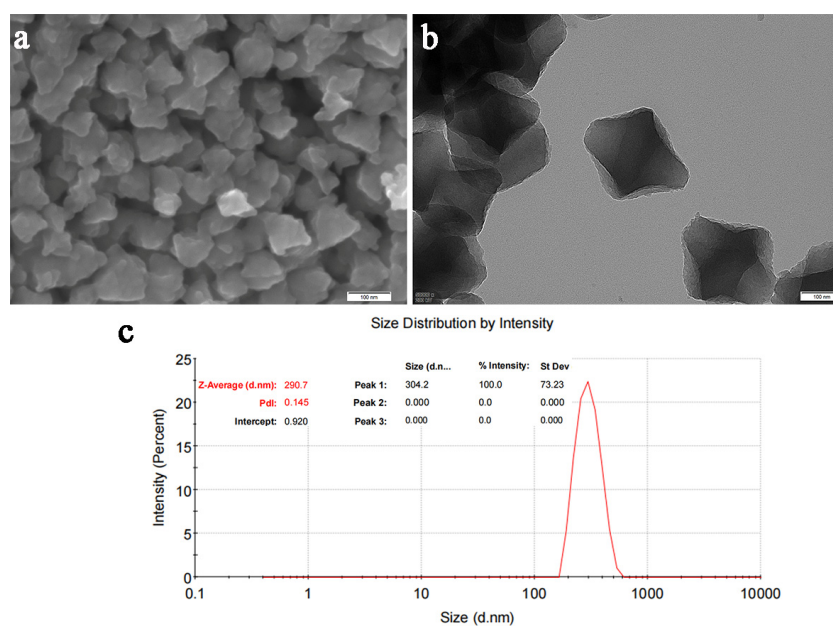

Figure S2. SEM (a), TEM (b) and DLS (c) images of Fe-MIL-101 (the scale bar indicated 100 nm).

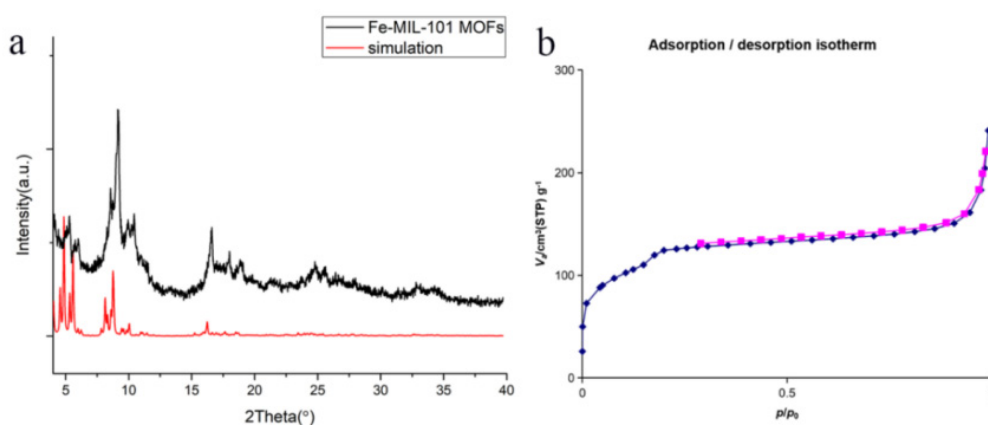

Figure S3. (a) XRD patterns of Fe-MIL-101, (b) N<sub>2</sub> adsorption-desorption isotherms of Fe-MIL-101.

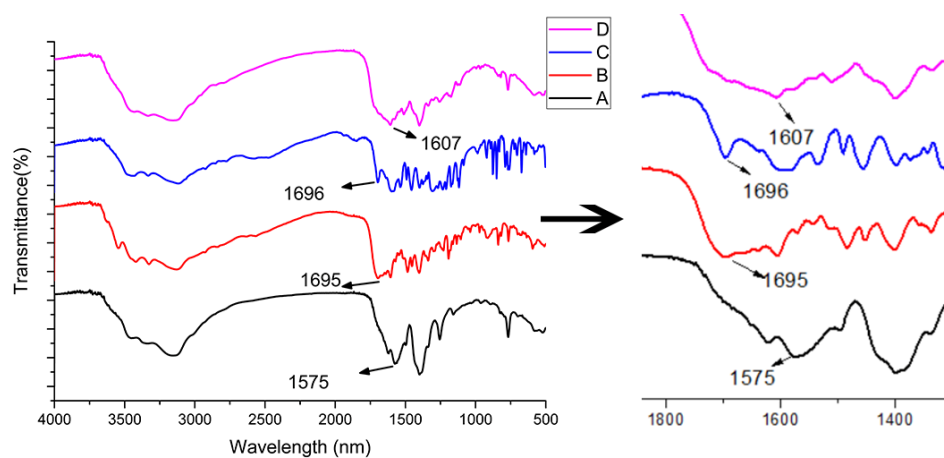

Figure S4. FTIR spectra of Fe-MIL-101 (A), FA (B), 5-FAM (C), 5-FAM/FA@Fe-MIL-101 (D).

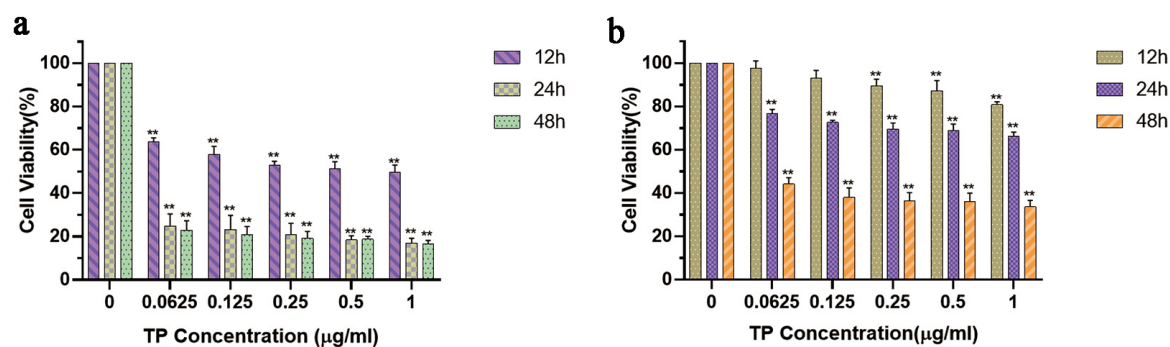

**Figure S5.** (a) Effect of TP on the viability of HepG2; (b) Effect of TP on the viability of L02. ( $n = 3$ ,  $**p < 0.01$ , significantly different compared with control).

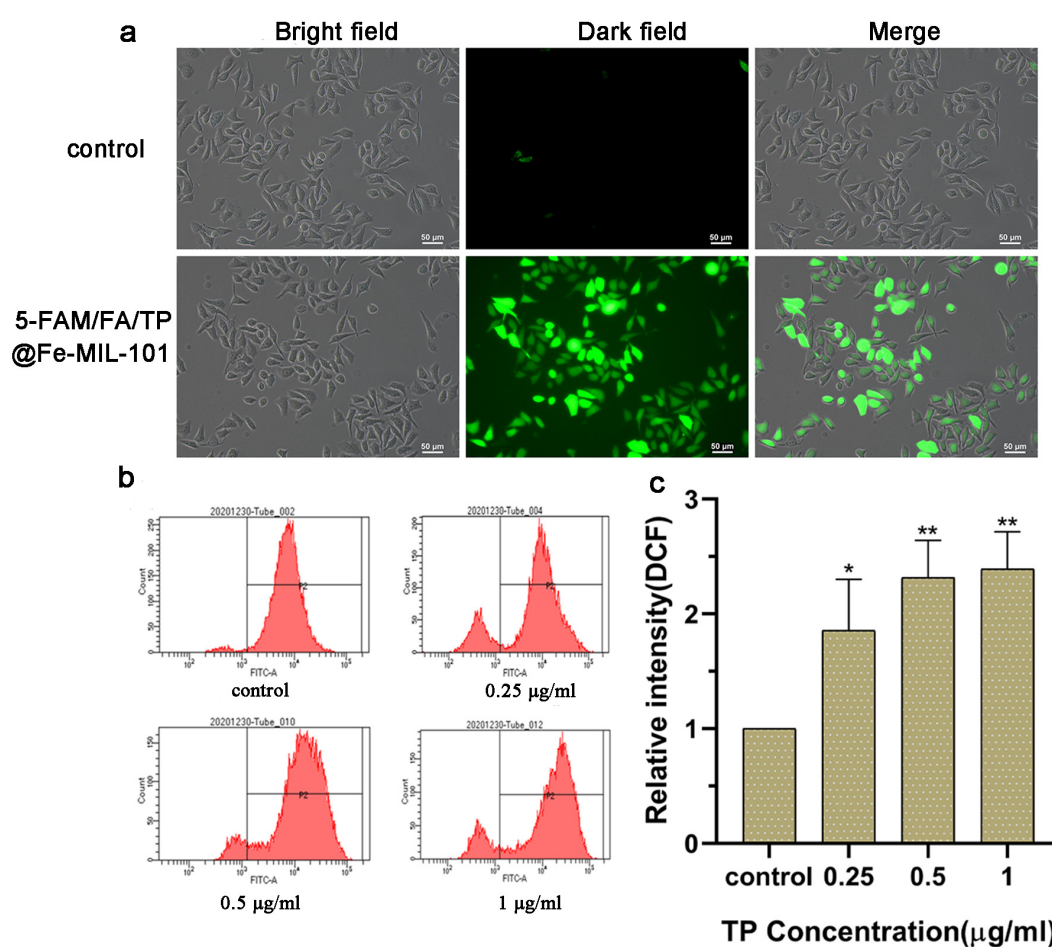

**Figure S6.** (a) Fluorescence microscope was used to observe control group and TP group; (b) Analysis of ROS generation using the oxidant sensitive fluorescent probe DCFH-DA; (c) Column bar graph of mean cell fluorescence for DCFH-DA. ( $*p < 0.05$ ,  $**p < 0.01$ ).

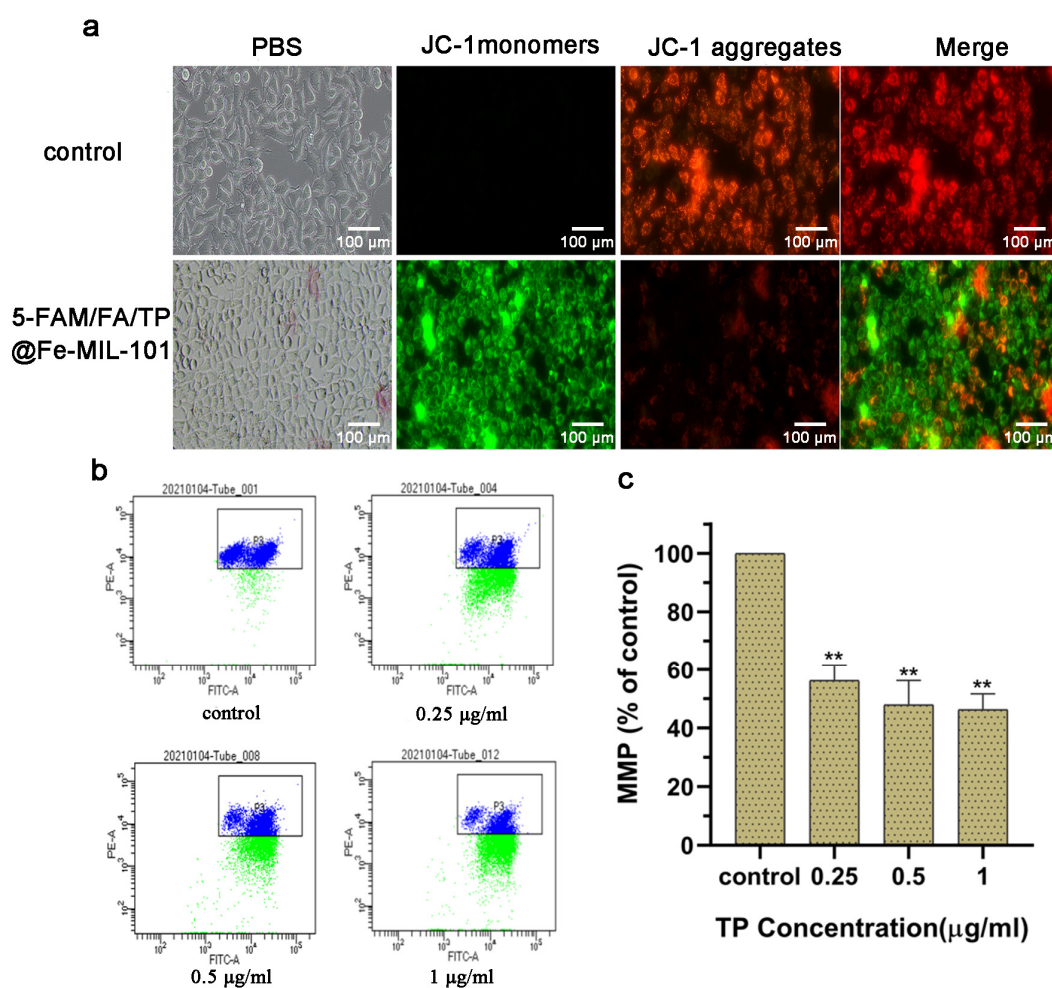

**Figure S7.** (a) Fluorescence microscope was used to observe control group and TP group (Red represents normal mitochondria, whereas green represents depolarized mitochondria); (b) MMP detection with JC-1 staining in different groups with flow cytometry flow cytometry. (Blue represents normal mitochondria, whereas green represents depolarized mitochondria); (c) Column bar graph of mean cell fluorescence for JC-1. (\*\* $p < 0.01$ ).

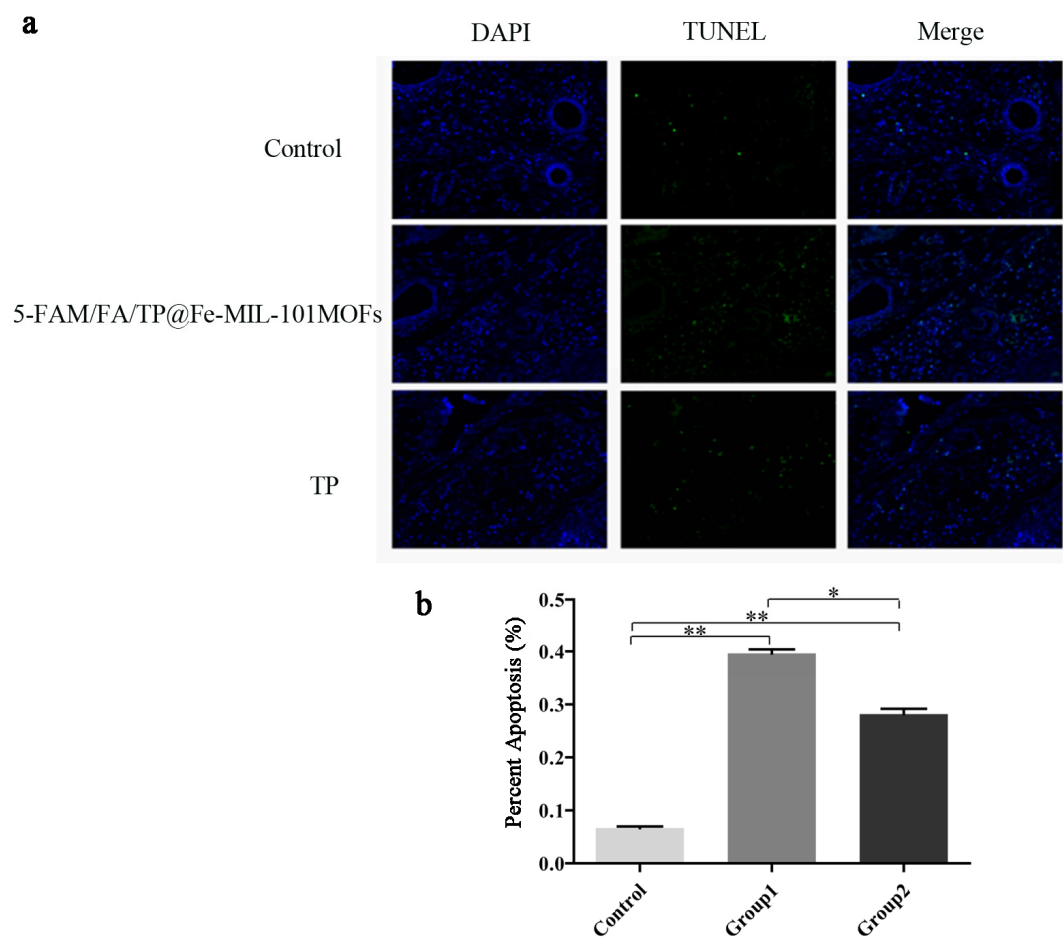

**Figure S8.** (a) TUNEL and DAPI double staining images of tumor tissues in each group (magnification:  $\times 200$ ); (b) Percentage of cell apoptosis in tumor tissues of each group (Group1: 5-FAM/FA/TP@Fe-MIL-101, Group2: TP;  $*p \leq 0.05$ ,  $**p \leq 0.01$ ).



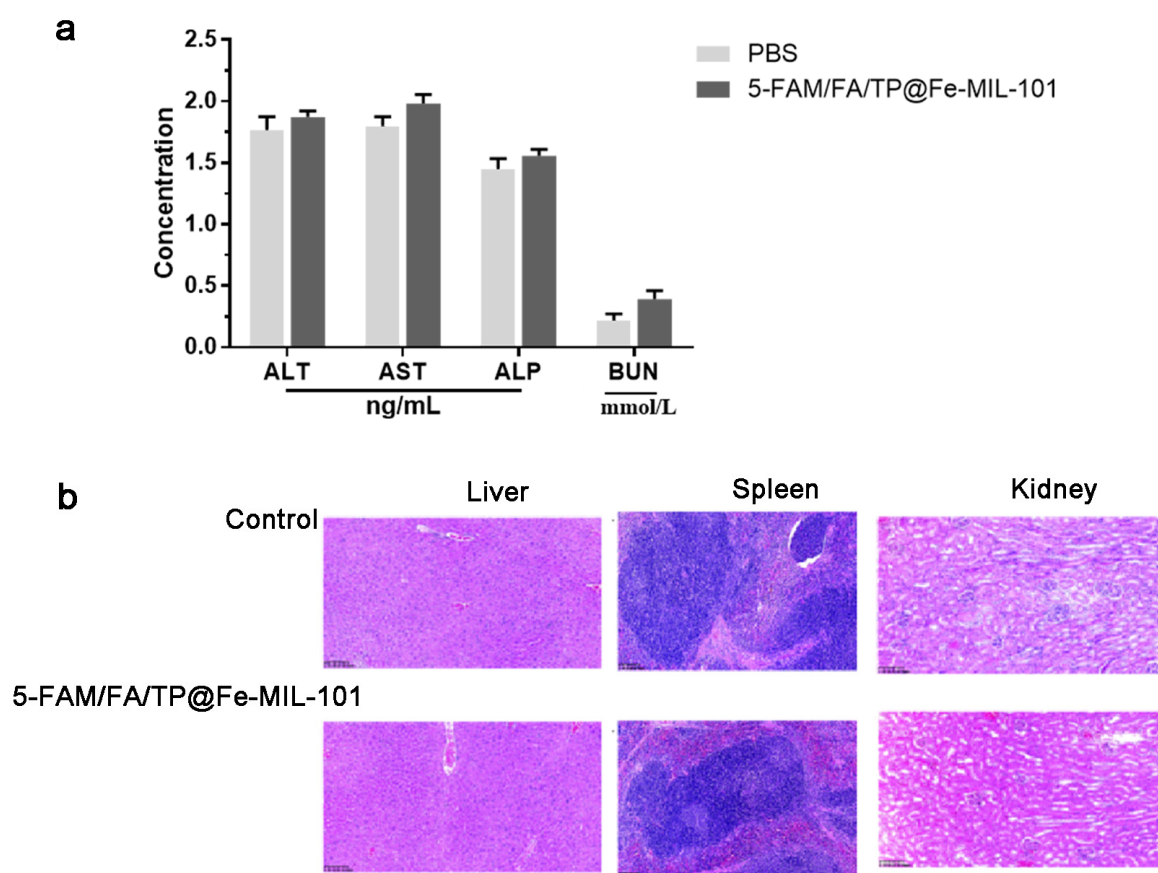

**Figure S9.** (a) ALT, AST, ALP, BUN indexes were detected; (b) H&E staining results of liver, spleen and kidney in each group (magnification:  $\times 200$ ).
